# Supplementary material for: Simulated Epidemics in an Empirical Spatiotemporal Network of 50,185 Sexual Contacts
Source: PLOS journal article supplement (doi:10.1371/journal.pcbi.1001109), 2011-03-17
Supplement: S2 (10.1371/journal.pcbi.1001109.s002) [file journal.pcbi.1001109.s002]

301 Moved Permanently

# Moved Permanently

The document has moved here.

---

Apache Server at www.ploscompbiol.org Port 80
